# Supplementary material
Source: HighWire-hosted journal article supplement (https://bmjopen.bmj.com/content/6/12/e012850)
Supplement: inline-supplementary-material-1 [file inline-supplementary-material-1.pdf]

**Supplement Table 1.** Criteria for discontinuing mechanical ventilation

| Criteria                        | Description                                                                                                                                                                                                                                                                                                                                                                                                                                                                                                  |
|---------------------------------|--------------------------------------------------------------------------------------------------------------------------------------------------------------------------------------------------------------------------------------------------------------------------------------------------------------------------------------------------------------------------------------------------------------------------------------------------------------------------------------------------------------|
| Objective measurements          | Adequate oxygenation ( $PO_2 \geq 60$ mm Hg on $FI_{O_2} \leq 0.4$ ; PEEP $\leq 5$ – $10$ cm $H_2O$ ; $PO_2/FI_{O_2} \geq 150$ – $300$ );<br>Stable cardiovascular system ([HR $\leq 140$ ; stable BP; no (or minimal) pressure)<br>Afebrile (temperature $< 38^\circ C$ )<br>No significant respiratory acidosis<br>Adequate hemoglobin ( $Hb \geq 8$ – $10$ g/dL)<br>Adequate mentation (arousable, GCS $\geq 13$ , no continuous sedative infusions)<br>Stable metabolic status (acceptable electrolytes) |
| Subjective clinical assessments | Resolution of the disease' acute phase, physician believes that discontinuation is possible, adequate cough                                                                                                                                                                                                                                                                                                                                                                                                  |

from reference [11]

**Supplement table 2**  
**Results of Kaplan–Meier analysis**

| Control group |         |          |          |         |              |              |
|---------------|---------|----------|----------|---------|--------------|--------------|
| Time          | n. risk | n. event | survival | std.err | lower 95% CI | upper 95% CI |
| 1             | 45      | 1        | 0.978    | 0.0220  | 0.853        | 0.997        |
| 2             | 44      | 1        | 0.956    | 0.0307  | 0.834        | 0.989        |
| 3             | 43      | 1        | 0.933    | 0.0372  | 0.807        | 0.978        |
| 5             | 42      | 1        | 0.911    | 0.0424  | 0.780        | 0.966        |
| 13            | 41      | 1        | 0.889    | 0.0468  | 0.753        | 0.952        |
| 14            | 40      | 1        | 0.867    | 0.0507  | 0.727        | 0.938        |
| 16            | 39      | 1        | 0.844    | 0.0540  | 0.701        | 0.923        |
| 17            | 38      | 1        | 0.822    | 0.0570  | 0.676        | 0.907        |
| 18            | 37      | 1        | 0.800    | 0.0596  | 0.651        | 0.891        |
| 38            | 36      | 1        | 0.778    | 0.0620  | 0.626        | 0.874        |
| 57            | 35      | 1        | 0.756    | 0.0641  | 0.602        | 0.856        |
| 62            | 34      | 1        | 0.733    | 0.0659  | 0.578        | 0.839        |

  

| rhTM group |         |          |          |         |              |              |
|------------|---------|----------|----------|---------|--------------|--------------|
| time       | n. risk | n. event | survival | std.err | lower 95% CI | upper 95% CI |
| 1          | 47      | 3        | 0.936    | 0.0357  | 0.815        | 0.979        |
| 3          | 44      | 1        | 0.915    | 0.0407  | 0.789        | 0.967        |
| 12         | 43      | 1        | 0.894    | 0.0450  | 0.763        | 0.954        |
| 17         | 42      | 1        | 0.872    | 0.0487  | 0.738        | 0.941        |
| 20         | 41      | 1        | 0.851    | 0.0519  | 0.713        | 0.926        |
| 24         | 40      | 1        | 0.830    | 0.0548  | 0.688        | 0.911        |
| 30         | 39      | 1        | 0.809    | 0.0574  | 0.664        | 0.895        |
| 35         | 38      | 1        | 0.787    | 0.0597  | 0.641        | 0.879        |
| 47         | 37      | 2        | 0.745    | 0.0636  | 0.594        | 0.846        |
| 62         | 35      | 1        | 0.723    | 0.0652  | 0.572        | 0.829        |

n.: number, std: standard, CI: confidence interval

**Supplemental Table 3.** Coagulation and inflammation data

### Coagulation data

| Measurement value  |       |                    |                    |                        |         | Relative change from baseline |                     |                      |                        |         |
|--------------------|-------|--------------------|--------------------|------------------------|---------|-------------------------------|---------------------|----------------------|------------------------|---------|
|                    |       | Control            | rhTM               | Difference<br>(95% CI) | p value |                               | Control             | rhTM                 | Difference<br>(95% CI) | p value |
| D-dimer<br>(µg/mL) | day 0 | 39.5 (21.9, 57.0)  | 30.2 (13.0, 47.3)  | -9.3 (-33.8, 15.2)     | 0.320   |                               |                     |                      |                        |         |
|                    | day 1 | 27.4 (17.3, 37.7)  | 18.3 (8.3, 28.3)   | -9.2(-23.4, 5.1)       | 0.094   | delta 1                       | -0.13 (-0.32, 0.05) | -0.29 (-0.46, -1.09) | -0.15 (-0.41, 0.10)    | 0.112   |
|                    | day 2 | 17.7 (10.4, 25.0)  | 12.8 (5.5, 20.0)   | -4.9(-15.2, 5.4)       | 0.214   | delta 2                       | -0.17 (-0.42, 0.06) | -0.49 (-0.73, -0.25) | -0.31 (-0.65, 0.03)    | 0.017   |
|                    | day 3 | 16.9 (11.4, 22.5)  | 9.6 (4.1, 15.0)    | -7.4 (-15.1, 0.4)      | 0.014   | delta 3                       | -0.11 (-0.39, 0.17) | -0.51 (-0.78, -0.24) | -0.40 (-0.79, -0.01)   | 0.008*  |
|                    | day 5 | 18.5 (12.9, 24.1)  | 8.0 (2.6, 13.5)    | -10.5 (-18.2, -2.7)    | 0.001*  | delta 5                       | -0.01 (-0.37, 0.35) | -0.52 (-0.87, -0.18) | -0.52 (-1.02, -0.02)   | 0.008*  |
|                    | day 7 | 20.6 (12.1, 29.2)  | 8.0 (-0.4, 16.5)   | -12.6 (-24.6, -0.6)    | 0.007*  | delta 7                       | 0.23 (-0.41, 0.86)  | -0.55 (-1.17, 0.07)  | -0.78 (-1.66, 0.11)    | 0.024   |
|                    | day   | 19.7 (13.2, 26.2)  | 7.0 (0.6, 13.5)    | -12.7 (-21.8, -3.5)    | <0.001* | delta 10                      | 0.35 (-0.74, 1.39)  | -0.43 (-1.48, 0.62)  | -0.76 (-2.25, 0.74)    | 0.185   |
| FDP<br>(µg/mL)     | day 0 | 78.3 (35.5, 121.1) | 62.3 (20.4, 104.1) | -16.0 (-75.9, 43.9)    | 0.483   |                               |                     |                      |                        |         |
|                    | day 1 | 55.3 (32.7, 77.9)  | 32.0 (10.1, 53.8)  | -23.4 (-54.8, 8.1)     | 0.053   | delta 1                       | -0.01 (-0.26, 0.12) | -0.29 (-0.48, -0.10) | -0.22 (-0.49, 0.05)    | 0.035   |
|                    | day 2 | 32.7 (18.2, 47.2)  | 25.3 (11.0, 39.6)  | -7.4 (-27.8, 13.0)     | 0.339   | delta 2                       | -0.20 (-0.44, 0.03) | -0.47 (-0.70, -0.24) | -0.27 (-0.59, 0.06)    | 0.036   |

|                                                  |        |                   |                   |                     |        |          |                      |                      |                      |        |
|--------------------------------------------------|--------|-------------------|-------------------|---------------------|--------|----------|----------------------|----------------------|----------------------|--------|
|                                                  | day 3  | 32.6 (21.2, 43.9) | 18.9 (7.7, 30.1)  | -13.7 (-29.6, 2.2)  | 0.026  | delta 3  | -0.09 (-0.38, 0.21)  | -0.48 (-0.78, -0.19) | -0.40 (-0.81, 0.0)   | 0.014  |
|                                                  | day 5  | 32.9 (20.9, 44.9) | 14.5 (2.9, 26.1)  | -18.4 (-35.1, -1.7) | 0.005* | delta 5  | -0.13 (-0.41, 0.15)  | -0.57 (-0.84, -0.30) | -0.43 (-0.82, -0.05) | 0.004* |
|                                                  | day 7  | 32.2 (20.0, 44.3) | 13.3 (1.3, 25.3)  | -18.9 (-36.0, -1.8) | 0.005* | delta 7  | -0.04 (-0.43, 0.35)  | -0.58 (-0.96, -0.20) | -0.54 (-1.09, 0.01)  | 0.011  |
|                                                  | day 10 | 30.7 (19.7, 41.6) | 11.4 (0.4, 22.3)  | -19.3 (-34.8, -3.8) | 0.002* | delta 10 | -0.20 (-0.48, 0.08)  | -0.66 (-0.94, -0.38) | -0.46 (-0.85, -0.06) | 0.003* |
| Platelet<br>( $\times 10^4$<br>/ $\mu\text{L}$ ) | day 0  | 13.3 (10.4, 16.3) | 13.5 (10.6, 16.3) | 0.11 (-4.0, 4.2)    | 0.946  |          |                      |                      |                      |        |
|                                                  | day 1  | 10.5 (8.2, 12.8)  | 10.7 (8.5, 13.0)  | 0.27 (-2.9, 3.5)    | 0.824  | delta 1  | -0.12 (-0.31, 0.07)  | -0.10 (-0.29, 0.08)  | 0.02 (-0.25, 0.28)   | 0.863  |
|                                                  | day 2  | 9.3 (7.1, 11.5)   | 10.6 (8.4, 12.8)  | 1.3 (-1.8, 4.4)     | 0.276  | delta 2  | -0.17 (-0.34, -0.01) | -0.12 (-0.29, 0.04)  | 0.05 (-0.18, 0.28)   | 0.573  |
|                                                  | day 3  | 9.4 (7.0, 11.8)   | 11.4 (9.1, 13.8)  | 2.1 (-1.3, 5.4)     | 0.108  | delta 3  | -0.17 (-0.36, 0.03)  | -0.02 (-0.21, 0.17)  | 0.15 (-0.12, 0.42)   | 0.156  |
|                                                  | day 5  | 12.2 (8.7, 15.8)  | 16.0 (12.5, 19.4) | 3.7 (-1.2, 8.6)     | 0.051  | delta 5  | 0.11 (-0.22, 0.44)   | 0.41 (0.09, 0.73)    | 0.30 (-0.16, 0.76)   | 0.086  |
|                                                  | day 7  | 16.9 (12.7, 21.1) | 22.2 (18.0, 26.3) | 5.3 (-0.7, 11.2)    | 0.021  | delta 7  | 0.57 (-0.14, 1.27)   | 1.30 (0.61, 1.99)    | 0.73 (-0.26, 1.72)   | 0.054  |
|                                                  | day 10 | 22.1 (16.8, 27.5) | 28.3 (23.1, 33.4) | 6.2 (-1.3, 13.6)    | 0.032  | delta 10 | 1.14 (0.22, 2.06)    | 1.93 (1.04, 2.81)    | 0.79 (-0.48, 2.06)   | 0.11   |
| PT-INR                                           | day 0  | 1.31 (1.14, 1.48) | 1.42 (1.25, 1.58) | 0.11 (-0.13, 0.34)  | 0.244  |          |                      |                      |                      |        |
|                                                  | day 1  | 1.33 (1.23, 1.43) | 1.35 (1.25, 1.45) | 0.02 (-0.11, 0.16)  | 0.654  | delta 1  | 0.02 (-0.04, 0.07)   | -0.01 (-0.06, 0.05)  | -0.03 (-0.10, 0.05)  | 0.376  |
|                                                  | day 2  | 1.27 (1.17, 1.36) | 1.24 (1.15, 1.34) | -0.02 (-0.15, 0.11) | 0.655  | delta 2  | -0.02 (-0.09, 0.05)  | -0.09 (-0.16, -0.03) | 0.07 (-0.17, 0.02)   | 0.053  |
|                                                  | day 3  | 1.23 (1.14, 1.32) | 1.20 (1.12, 1.29) | -0.02 (-0.15, 0.10) | 0.635  | delta 3  | -0.05 (-0.11, 0.01)  | -0.12 (-0.18, -0.06) | -0.07 (-0.16, 0.02)  | 0.042  |

|         |        |                      |                       |                         |       |          |                      |                       |                     |       |
|---------|--------|----------------------|-----------------------|-------------------------|-------|----------|----------------------|-----------------------|---------------------|-------|
|         | day 5  | 1.25 (1.17, 1.32)    | 1.19 (1.12, 1.27)     | -0.05 (-0.16, 0.05)     | 0.196 | delta 5  | -0.03 (-0.11, 0.05)  | -0.12 (-0.20, -0.04)  | -0.09 (0.20, 0.02)  | 0.040 |
|         | day 7  | 1.29 (1.15, 1.44)    | 1.20 (1.06, 1.34)     | -0.09 (-0.25, 0.11)     | 0.226 | delta 7  | -0.01 (-0.11, 0.10)  | -0.12 (-0.22, -0.016) | -0.11 (-0.26, 0.04) | 0.050 |
|         | day 10 | 1.23 (1.11, 1.35)    | 1.23 (1.11, 1.34)     | -0.004 (-0.17, 0.16)    | 0.951 | delta 10 | -0.05 (-0.15, 0.04)  | -0.10 (-0.19, -0.01)  | -0.05 (-0.18, 0.09) | 0.374 |
| Fib     | day 0  | 457.1 (376.0, 538.2) | 456.4 (376.2, 536.6)  | -0.73 (-114.8, 113.3)   | 0.99  |          |                      |                       |                     |       |
| (mg/dL) | day 1  | 445.0 (370.1, 519.4) | 436.4 (364.5, 508.3)  | -8.61 (-112.1, 94.9)    | 0.827 | delta 1  | -0.03 (-0.14, 0.09)  | 0.02 (-0.09, 0.13)    | 0.05 (-0.11, 0.21)  | 0.433 |
|         | day 2  | 455.7 (381.3, 530.1) | 473.0 (401.25, 544.8) | 17.3 (-86.1, 120.7)     | 0.660 | delta 2  | 0.06 (-0.12, 0.25)   | 0.18 (-0.01, 0.36)    | 0.11 (-0.15, 0.37)  | 0.299 |
|         | day 3  | 434.0 (353.7, 514.3) | 457.3 (379.9, 534.8)  | 23.3 (-88.2, 134.)      | 0.583 | delta 3  | 0.03 (-0.20, 0.25)   | 0.17 (-0.05, 0.38)    | 0.14 (-0.17, 0.45)  | 0.247 |
|         | day 5  | 414.6 (332.7, 496.6) | 424.5 (346.6, 502.3)  | 9.8 (-103.2, 122.9)     | 0.819 | delta 5  | -0.04 (-0.29, 0.20)  | 0.15 (-0.08, 0.39)    | 0.19 (-0.14, 0.53)  | 0.134 |
|         | day 7  | 389.3 (318.4, 460.0) | 391.5 (323.4, 459.6)  | 2.3 (-95.9, 100.5)      | 0.952 | delta 7  | -0.11 (-0.36, 0.14)  | 0.12 (-0.13, 0.37)    | 0.23 (-0.13, 0.58)  | 0.094 |
|         | day 10 | 335.8 (264.0, 407.6) | 423.4 (354.5, 492.2)  | 87.6 (-11.916, 187.071) | 0.025 | delta 10 | -0.17 (-0.48, 0.14)  | 0.19 (-0.11, 0.49)    | 0.36 (-0.07, 0.79)  | 0.028 |
| ATIII   | day 0  | 58.8 (50.7, 97.0)    | 62.8 (54.8, 70.7)     | 3.93 (-7.5, 15.3)       | 0.367 |          |                      |                       |                     |       |
| (%)     | day 1  | 48.9 (42.1, 55.7)    | 54.8 (48.2, 61.3)     | 5.85 (-3.6, 15.3)       | 0.106 | delta 1  | -1.62 (-0.25, -0.08) | -0.12 (-0.20, -0.03)  | 0.05 (-0.07, 0.16)  | 0.265 |
|         | day 2  | 51.3 (43.7, 58.8)    | 57.1 (49.8, 64.4)     | 5.85 (-4.6, 16.3)       | 0.144 | delta 2  | -0.14 (-0.23, -0.05) | -0.09 (-0.17, -0.003) | 0.05 (-0.07, 0.17)  | 0.257 |
|         | day 3  | 55.0 (47.0, 63.0)    | 62.6 (54.7, 70.4)     | 7.60 (-3.6, 18.8)       | 0.078 | delta 3  | -0.08 (-0.18, 0.02)  | 0.02 (-0.07, 0.12)    | 0.10 (-0.03, 0.24)  | 0.049 |
|         | day 5  | 60.6 (52.4, 68.9)    | 69.7 (61.6, 77.7)     | 9.02 (-2.5, 20.6)       | 0.042 | delta 5  | 0.02 (-0.11, 0.15)   | 0.17 (0.04, 0.30)     | 0.15 (-0.03, 0.33)  | 0.032 |

|        |                   |                   |                   |       |          |                     |                   |                    |       |
|--------|-------------------|-------------------|-------------------|-------|----------|---------------------|-------------------|--------------------|-------|
| day 7  | 64.5 (54.9, 74.1) | 74.1 (64.9, 83.3) | 9.58 (-3.7, 22.9) | 0.061 | delta 7  | 0.10 ( -0.03, 0.23) | 0.20 (0.07, 0.32) | 0.10 (-0.09, 0.28) | 0.171 |
| day 10 | 66.5 (55.9, 77.1) | 80.0 (69.8, 90.1) | 13.4 (-1.3, 28.1) | 0.018 | delta 10 | 0.16 (0.02, 0.31)   | 0.28 (0.14, 0.41) | 0.12 (-0.08, 0.31) | 0.120 |

### Inflammation data

| Measurement value             |        |                      |                      |                        |         | Relative change from baseline |                    |                     |                       |                        |         |
|-------------------------------|--------|----------------------|----------------------|------------------------|---------|-------------------------------|--------------------|---------------------|-----------------------|------------------------|---------|
|                               |        | Control              | rhTM                 | Difference<br>(95% CI) | p value |                               |                    | Control             | rhTM                  | Difference<br>(95% CI) | p value |
| CRP<br>(mg/dL)                | day 0  | 20.5 (16.0, 25.0)    | 18.5 (14.0, 23.0)    | -2.0 (-8.4, 4.4)       | 0.409   |                               |                    |                     |                       |                        |         |
|                               | day 1  | 19.2 (14.9, 23.5)    | 15.7 (11.5, 19.9)    | -3.5 (-9.5, 2.5)       | 0.130   | delta 1                       | 1.7 (0.14, 3.27)   | 1.4 (-0.12, 2.98)   | -0.28 (-2.48, 1.92)   | 0.740                  |         |
|                               | day 2  | 14.9 (11.5, 18.3)    | 10.8 (7.5, 14.1)     | -4.1 (-8.8, 0.7)       | 0.027   | delta 2                       | 8.0 (-4.21, 20.25) | 1.7 (-10.22, 13.67) | -6.3 (-23.39, 10.796) | 0.334                  |         |
|                               | day 3  | 10.7 (7.2, 14.2)     | 7.7 (4.3, 11.0)      | -3.0 (-7.8, 1.8)       | 0.104   | delta 3                       | 5.1 (-3.36, 13.48) | 0.9 (-7.26, 8.98)   | -4.2 (-15.90, 7.50)   | 0.347                  |         |
|                               | day 5  | 8.2 (5.6, 10.8)      | 5.2 (2.7, 7.7)       | -3.0 (-6.6, 0.6)       | 0.031   | delta 5                       | 3.5 (-2.64, 9.63)  | 0.4 (-5.34, 6.18)   | -3.1 (-11.50, 5.34)   | 0.337                  |         |
|                               | day 7  | 5.8 (3.7, 7.9)       | 4.0 (1.9, 6.0)       | -1.8 (-4.7, 1.1)       | 0.100   | delta 7                       | 2.9 (-2.48, 8.20)  | -0.04 (-5.11, 5.03) | -2.90 (-10.26, 4.46)  | 0.302                  |         |
|                               | day 10 | 8.5 (2.9, 14.1)      | 4.0 (-1.5, 9.4)      | -4.5 (-12.3, 3.3)      | 0.131   | delta 10                      | 1.4 (-6.25, 9.14)  | 3.0 (-4.35, 10.41)  | 1.9(-9.08, 12.25)     | 0.695                  |         |
| WBC<br>(×10 <sup>2</sup> /μL) | day 0  | 12.63 (9.24, 16.02)  | 14.35 (11.03, 17.67) | 1.7 (-3.02, 6.46)      | 0.343   |                               |                    |                     |                       |                        |         |
|                               | day 1  | 14.55 (10.38, 18.72) | 15.01 (10.89, 19.14) | 0.4 (-5.40, 6.33)      | 0.836   | delta 1                       | 0.6 (-0.11, 1.37)  | 0.4 (-0.36, 1.11)   | -0.2 (-1.30, 0.80)    | 0.532                  |         |
|                               | day 2  | 12.31 (9.14, 15.48)  | 12.98 (9.84, 16.11)  | 0.7 (-3.79, 5.12)      | 0.695   | delta 2                       | 0.6 (-0.12, 1.25)  | 0.2 (-0.43, 0.93)   | -0.3 (-1.29, 0.64)    | 0.383                  |         |

|        |                     |                     |                     |       |          |                   |                    |                    |       |
|--------|---------------------|---------------------|---------------------|-------|----------|-------------------|--------------------|--------------------|-------|
| day 3  | 11.13 (8.42, 13.84) | 10.97 (8.29, 13.65) | -0.2 (-3.98, 3.65)  | 0.909 | delta 3  | 0.7 (-0.13, 1.61) | 0.04 (-0.81, 0.90) | -0.7 (-1.92, 0.53) | 0.137 |
| day 5  | 10.34 (7.64, 13.04) | 11.24 (8.64, 13.84) | 0.9 (-2.84, 4.64)   | 0.528 | delta 5  | 0.6 (-0.36, 1.55) | 0.2 (-0.69, 1.15)  | -0.4 (-1.7, 0.9)   | 0.465 |
| day 7  | 10.88 (8.42, 13.34) | 10.84 (8.44, 13.23) | -0.05 (-3.47, 3.39) | 0.975 | delta 7  | 0.7 (-0.26, 1.62) | 0.1 (-0.83, 0.99)  | -0.6 (-1.91, 0.71) | 0.230 |
| day 10 | 11.25 (9.48, 13.04) | 9.49 (7.76, 11.22)  | -1.8 (-4.24, 0.71)  | 0.064 | delta 10 | 0.5 (-0.38, 1.40) | 0.02 (-0.85, 0.89) | -0.5 (-1.73, 0.75) | 0.298 |

mean (95% confidence interval)

PTINR, prothrombin time–international normalized ratio;

Fib, fibrinogen; AT III, antithrombin III; CRP, C-reactive protein; WBC, white blood cell

Relative change rate from baseline = ([measurement day value – day 0 value]/day 0 value).

This table includes fibrin/fibrinogen degradation products (FDP) value. This information was not noted in the main manuscript to avoid redundancy.

**Supplemental Table 4.** Sequential Organ Failure Assessment score (SOFA score)

| Measurement value         |        |                |                |                        |            | Relative change from baseline |                    |                   |                   |                        |            |
|---------------------------|--------|----------------|----------------|------------------------|------------|-------------------------------|--------------------|-------------------|-------------------|------------------------|------------|
|                           |        | Control        | rhTM           | Difference<br>(95% CI) | p<br>value |                               |                    | Control           | rhTM              | Difference<br>(95% CI) | p<br>value |
| SOFA(R)<br>(points)       | day 0  | 2.0 (1.4, 2.6) | 1.7 (1.1, 2.2) | -0.3 (-1.1, 0.5)       | 0.334      |                               |                    |                   |                   |                        |            |
|                           | day 1  | 2.0 (1.5, 2.5) | 1.2 (0.7, 1.7) | -0.8 (-1.5, -0.1)      | 0.004*     | delta 1                       | 0.05 (-0.3, 0.4)   | -0.4 (-0.7, -0.1) | -0.5 (-0.9, 0.02) | 0.013                  |            |
|                           | day 2  | 1.6 (1.1, 2.1) | 0.9 (0.4, 1.3) | -0.7 (-1.4, -0.1)      | 0.004*     | delta 2                       | -0.3 (-0.7, 0.2)   | -0.7 (-1.1, -0.2) | -0.4 (-1.0, 0.2)  | 0.088                  |            |
|                           | day 3  | 1.4 (0.9, 1.8) | 0.7 (0.3, 1.2) | -0.6 (-1.3, 0.02)      | 0.012      | delta 3                       | -0.5 (-1.0, -0.03) | -0.8 (-1.3, -0.3) | -0.3 (-0.9, 0.4)  | 0.247                  |            |
|                           | day 5  | 1.2 (0.7, 1.7) | 0.6 (0.2, 1.1) | -2.2 (-1.3, 0.11)      | 0.029      | delta 5                       | -0.7 (-1.2, -0.2)  | -0.9 (-1.4, -0.4) | -0.2 (-0.9, 0.4)  | 0.343                  |            |
|                           | day 7  | 1.2 (0.7, 1.7) | 0.6 (0.1, 1.1) | -0.6 (-1.3, 0.1)       | 0.021      | delta 7                       | -0.7 (-1.2, -0.2)  | -1.0 (-1.5, -0.5) | -0.3 (-1.1, 0.4)  | 0.225                  |            |
|                           | day 10 | 0.9 (0.5, 1.3) | 0.4 (0.0, 0.8) | -0.5 (-1.1, 0.1)       | 0.031      | delta 10                      | -1.1 (-1.7, -0.5)  | -1.2 (-1.8, -0.6) | -0.1 -0.9, 0.7    | 0.737                  |            |
| Total<br>SOFA<br>(points) | day 0  | 8.1 (7.1, 9.1) | 7.3 (6.4, 8.3) | -0.7 (-2.1, 0.6)       | 0.367      |                               |                    |                   |                   |                        |            |
|                           | day 1  | 8.0 (6.3, 9.7) | 6.5 (4.8, 8.1) | -1.5 (-3.9, 0.8)       | 0.091      | delta 1                       | 0.02 (-0.9, 0.)    | -0.8 (-1.7, 0.1)  | -0.8 (-2.0, 0.5)  | 0.121                  |            |
|                           | day 2  | 6.9 (5.9, 7.9) | 5.3 (4.2, 6.3) | -1.6 (-3.1, -0.1)      | 0.071      | delta 2                       | -1.0 (-2.0, -0.01) | -1.8 (-2.8, -0.9) | -0.8 (-2.2, 0.6)  | 0.118                  |            |
|                           | day 3  | 6.0 (4.3, 7.6) | 4.6 (2.9, 6.2) | -1.4 (-3.7, 0.9)       | 0.120      | delta 3                       | -1.9 (-3.1, -0.8)  | -2.6 (-3.7, -1.4) | -0.6 (-2.3, 1.0)  | 0.308                  |            |
|                           | day 5  | 4.9 (3.2, 6.6) | 3.5 (1.8, 5.1) | -1.4 (-3.8, 0.9)       | 0.113      | delta 5                       | -3.2 (-4.6, -1.9)  | -3.7 (-5.0, -2.4) | -0.5 (-2.3, 1.4)  | 0.490                  |            |
|                           | day 7  | 4.3 (2.6, 6.0) | 2.6 (1.0, 4.3) | -1.6 (-4.0, 0.8)       | 0.075      | delta 7                       | -3.8 (-5.3, -2.4)  | -4.6 (-6.0, -3.2) | -0.7 (-2.8, 1.2)  | 0.317                  |            |
|                           | day 10 | 3.6 (2.0, 5.2) | 2.4 (0.8, 4.0) | -1.2 (-3.5, 1.1)       | 0.159      | delta 10                      | -4.8 (-6.2, -3.3)  | -4.7 (-6.1, -3.3) | 0.1 (-1.9, 2.1)   | 0.924                  |            |

SOFA (R), SOFA scores of respiratory

Change rate from baseline = SOFA score of measurement day – SOFA score of day 0.

\* shows statistically significance (p &lt; 0.01).



**Supplemental Table 5. Ventilator-free days, blood transfusion, and albumin and heparin use**

| Characteristics                     | Control (n = 45)                       | rhTM* (n = 47)           | p value               |
|-------------------------------------|----------------------------------------|--------------------------|-----------------------|
| Ventilator free day at day 28       | 15.5 (10.7, 20.2)*                     | 17.5 (9.2, 17.7)*        | 0.530**               |
| Blood transfusion (within 72 h)     |                                        |                          |                       |
| RBC (U)                             | 8.0 [2.0, 10.0] <sup>\$</sup> , n = 11 | 3.0 [2.0, 8.0], n = 10   | 0.089 <sup>\$\$</sup> |
| FFP (U)                             | 10.0 [8.0, 20.0], n = 5                | 5.0 [4.0, 24.0], n = 7   | 0.100 <sup>\$\$</sup> |
| PC (U)                              | 30.0 [10.0, 70.0], n = 6               | 20.0 [10.0, 90.0], n = 5 | 0.710 <sup>\$\$</sup> |
| Albumin use, n (within 72 h)        | 16 (35.6)                              | 4 (8.5)                  | 0.002 <sup>\$\$</sup> |
| Albumin preparation (mg), n = 16, 4 | 50.0 [34.4, 65.6]                      | 37.5 [12.5, 84.4]        | 0.632 <sup>\$\$</sup> |
| *Heparin use, n (%)                 | 7 (15.6)                               | 1 (2.2)                  | NA                    |

Heparin was used on diagnosis of deep venous thrombosis

Ventilator free day at day 28 was defined as the number of days a patient had breathed without mechanical ventilation for at least 48 h continuously during a 28-day period. Patients who did not survive till 28 days were assigned 0 ventilator free days.

RBC, red blood cell; FFP, fresh freeze plasma; PC, platelet

\* mean (95% confidence interval), \*\* An unpaired t test was performed.

<sup>\$</sup> median [25percentile, 75percentile], <sup>\$\$</sup> Mann-Whitney test was performed.

NA: none available.

Supplemental Table 6. Other Laboratory findings

|               |        | Control         | rhTM            | P value |
|---------------|--------|-----------------|-----------------|---------|
| n             |        | 45              | 47              |         |
| Alb<br>(g/dL) | day 0  | 2.65 (0.72)     | 2.94 (0.63)     | 0.051   |
|               | day 1  | 2.07 (0.38)     | 2.33 (0.40)     | 0.004*  |
|               | day 2  | 2.05 (0.41)     | 2.18 (0.42)     | 0.166   |
|               | day 3  | 2.08 (0.39)     | 2.23 (0.43)     | 0.111   |
|               | day 5  | 2.06 (0.42)     | 2.28 (0.48)     | 0.041   |
|               | day 7  | 2.11 (0.46)     | 2.26 (0.49)     | 0.177   |
|               | day 10 | 2.11 (0.44)     | 2.36 (0.53)     | 0.038   |
| Delta Alb     |        | -0.21 (0.15)    | -0.17 (0.18)    | 0.342   |
|               |        | -0.24 (0.16)    | -0.22 (0.19)    | 0.656   |
|               |        | -0.22 (0.17)    | -0.21 (0.22)    | 0.801   |
|               |        | -0.22 (0.19)    | -0.19 (0.21)    | 0.633   |
|               |        | -0.21 (0.21)    | -0.20 (0.25)    | 0.919   |
|               |        | -0.19 (0.22)    | -0.15 (0.28)    | 0.476   |
| ALP<br>(IU/L) | day 0  | 327.72 (290.90) | 362.71 (357.99) | 0.674   |
|               | day 1  | 255.81 (194.08) | 283.22 (186.25) | 0.54    |
|               | day 2  | 252.77 (214.62) | 330.24 (330.80) | 0.279   |
|               | day 3  | 270.18 (184.96) | 323.81 (308.08) | 0.382   |
|               | day 5  | 276.21 (166.61) | 369.69 (466.70) | 0.317   |
|               | day 7  | 296.57 (145.90) | 382.18 (341.37) | 0.207   |
|               | day 10 | 326.86 (162.12) | 418.10 (417.71) | 0.284   |
| ALT<br>(IU/L) | day 0  | 62.84 (89.26)   | 115.30 (209.89) | 0.129   |
|               | day 1  | 78.07 (127.98)  | 135.07 (233.97) | 0.162   |
|               | day 2  | 90.37 (168.76)  | 115.47 (198.39) | 0.537   |
|               | day 3  | 106.90 (224.77) | 122.61 (227.07) | 0.754   |
|               | day 5  | 94.65 (153.06)  | 101.85 (171.84) | 0.846   |
|               | day 7  | 65.15 (63.89)   | 79.34 (103.25)  | 0.469   |
|               | day 10 | 68.19 (68.87)   | 63.49 (75.34)   | 0.781   |
| AST<br>(IU/L) | day 0  | 114.02 (147.40) | 229.47 (430.63) | 0.092   |
|               | day 1  | 135.29 (188.04) | 274.35 (522.03) | 0.096   |

|                |        |                 |                 |       |
|----------------|--------|-----------------|-----------------|-------|
|                | day 2  | 153.38 (341.98) | 180.19 (246.58) | 0.679 |
|                | day 3  | 192.90 (549.88) | 159.44 (255.87) | 0.719 |
|                | day 5  | 120.82 (305.89) | 103.17 (117.07) | 0.729 |
|                | day 7  | 61.21 (67.53)   | 68.68 (100.29)  | 0.698 |
|                | day 10 | 74.95 (160.93)  | 44.42 (30.49)   | 0.255 |
| LDH<br>(IU/L)  | day 0  | 407.14 (207.25) | 556.49 (679.65) | 0.166 |
|                | day 1  | 368.42 (215.27) | 495.57 (548.45) | 0.159 |
|                | day 2  | 344.37 (235.32) | 381.98 (215.62) | 0.447 |
|                | day 3  | 365.35 (308.27) | 391.23 (279.30) | 0.689 |
|                | day 5  | 351.24 (235.63) | 355.95 (155.61) | 0.916 |
|                | day 7  | 316.47 (157.25) | 332.00 (131.56) | 0.635 |
|                | day 10 | 300.60 (146.05) | 284.13 (81.80)  | 0.55  |
| Bil<br>(mg/dL) | day 0  | 1.15 (0.86)     | 1.67 (1.24)     | 0.023 |
|                | day 1  | 0.98 (0.77)     | 1.69 (3.10)     | 0.139 |
|                | day 2  | 0.94 (0.88)     | 1.26 (1.12)     | 0.141 |
|                | day 3  | 1.02 (1.21)     | 1.23 (1.08)     | 0.396 |
|                | day 5  | 1.28 (2.29)     | 1.64 (3.14)     | 0.562 |
|                | day 7  | 1.32 (2.66)     | 1.30 (1.90)     | 0.972 |
|                | day 10 | 1.33 (3.41)     | 1.53 (2.74)     | 0.778 |
| BUN<br>(mg/dL) | day 0  | 39.89 (26.37)   | 45.96 (36.80)   | 0.367 |
|                | day 1  | 39.05 (27.09)   | 40.15 (28.01)   | 0.849 |
|                | day 2  | 35.19 (26.29)   | 133.08 (652.19) | 0.334 |
|                | day 3  | 31.43 (24.80)   | 33.27 (41.88)   | 0.807 |
|                | day 5  | 26.11 (20.12)   | 25.73 (28.18)   | 0.945 |
|                | day 7  | 26.54 (19.53)   | 22.68 (18.80)   | 0.371 |
|                | day 10 | 31.60 (34.35)   | 28.26 (39.51)   | 0.697 |
| Cr<br>(mg/dL)  | day 0  | 2.21 (2.14)     | 2.30 (2.44)     | 0.841 |
|                | day 1  | 1.95 (2.06)     | 4.77 (20.44)    | 0.361 |
|                | day 2  | 1.63 (1.98)     | 1.48 (1.50)     | 0.693 |
|                | day 3  | 1.50 (1.75)     | 1.31 (1.39)     | 0.574 |
|                | day 5  | 1.47 (1.59)     | 1.15 (1.17)     | 0.299 |
|                | day 7  | 1.39 (1.60)     | 1.18 (1.24)     | 0.505 |
|                | day 10 | 57.95 (344.70)  | 1.78 (3.31)     | 0.318 |
| Na             | day 0  | 140.62 (7.94)   | 139.64 (6.89)   | 0.527 |

|                         |        |                |                |       |
|-------------------------|--------|----------------|----------------|-------|
| (mEq/L)                 | day 1  | 142.49 (7.64)  | 140.89 (6.82)  | 0.308 |
|                         | day 2  | 142.33 (6.85)  | 141.19 (6.91)  | 0.444 |
|                         | day 3  | 140.71 (8.02)  | 140.53 (6.15)  | 0.908 |
|                         | day 5  | 141.72 (4.51)  | 140.38 (5.32)  | 0.228 |
|                         | day 7  | 140.92 (5.58)  | 140.27 (4.52)  | 0.565 |
|                         | day 10 | 140.05 (5.26)  | 139.92 (3.77)  | 0.9   |
| <hr/>                   |        |                |                |       |
| Cl                      | day 0  | 102.53 (19.24) | 103.16 (7.29)  | 0.852 |
| (mEq/L)                 | day 1  | 106.83 (18.63) | 105.34 (18.37) | 0.721 |
|                         | day 2  | 103.79 (25.81) | 108.45 (7.03)  | 0.276 |
|                         | day 3  | 108.95 (6.47)  | 107.70 (6.66)  | 0.408 |
|                         | day 5  | 102.80 (23.65) | 107.13 (6.22)  | 0.275 |
|                         | day 7  | 104.00 (18.53) | 107.19 (4.32)  | 0.312 |
|                         | day 10 | 100.58 (25.74) | 103.46 (17.81) | 0.592 |
| <hr/>                   |        |                |                |       |
| RBC                     | day 0  | 3.93 (0.84)    | 4.05 (0.98)    | 0.504 |
| (x 10 <sup>6</sup> /uL) | day 1  | 9.77 (42.12)   | 3.50 (0.68)    | 0.315 |
|                         | day 2  | 3.37 (0.55)    | 3.35 (0.67)    | 0.9   |
|                         | day 3  | 3.35 (0.49)    | 4.17 (4.97)    | 0.291 |
|                         | day 5  | 3.53 (0.75)    | 3.74 (1.94)    | 0.526 |
|                         | day 7  | 3.39 (0.57)    | 53.42 (319.13) | 0.331 |
|                         | day 10 | 4.31 (5.76)    | 3.34 (0.76)    | 0.308 |
| <hr/>                   |        |                |                |       |
| Hb                      | day 0  | 12.72 (4.73)   | 12.86 (2.87)   | 0.855 |
| (g/dL)                  | day 1  | 11.20 (3.90)   | 11.03 (1.95)   | 0.792 |
|                         | day 2  | 10.45 (1.74)   | 10.55 (1.88)   | 0.797 |
|                         | day 3  | 10.37 (1.39)   | 10.79 (1.98)   | 0.267 |
|                         | day 5  | 10.40 (1.88)   | 10.89 (2.15)   | 0.283 |
|                         | day 7  | 10.37 (1.83)   | 12.42 (10.62)  | 0.238 |
|                         | day 10 | 10.27 (1.85)   | 12.71 (13.06)  | 0.271 |

Mean (standard deviation)

Alb: albumin, Bil: bilirubin, Cr: creatinine

\* shows statistically significance (p < 0.01).

**Supplemental Table 7.** Kaplan–Meier analysis of the severe and moderate groups

|         |                     | Moderate group (n = 51) |              | Lo- rank test<br>p |
|---------|---------------------|-------------------------|--------------|--------------------|
|         |                     | Survival                | Non-survival |                    |
| 28 days | Control<br>(n = 24) | 24 (100%)               | 0            | 0.178              |
|         | rhTM<br>(n= 27)     | 25 (93%)                | 2 (7%)       |                    |
| 90 days | Control<br>(n = 24) | 22 (92%)                | 2 (8%)       | 0.278              |
|         | rhTM<br>(n = 27)    | 22 (81%)                | 5 (19%)      |                    |
|         |                     | Severe group (n = 41)   |              | Log-rank test<br>p |
|         |                     | Survival                | Non-survival |                    |
| 28 days | Control<br>(n = 21) | 12 (57%)                | 9 (43%)      | 0.376              |
|         | rhTM (n<br>= 20)    | 14 (70%)                | 6 (30%)      |                    |
| 90 days | Control<br>(n = 21) | 11 (52%)                | 10 (48%)     | 0.524              |
|         | rhTM<br>( n = 20)   | 12 (60%)                | 8 (40%)      |                    |

Moderate group comprises patients with APACHE II score < 20 points.

Severe group comprises patients with APACHE II score  $\leq$  20 points.

**Supplemental Table 8.** Kaplan–Meier analysis of patients who experienced disseminated intravascular coagulation resolution

|         |         | Within 3 days |              | Log-rank test<br>p |
|---------|---------|---------------|--------------|--------------------|
|         |         | Survival      | Non-survival |                    |
| 28 days | Control | 13            | 4            | 0.358              |
|         | rhTM    | 27            | 4            |                    |
| 90 days | Control | 11            | 6            | 0.231              |
|         | rhTM    | 25            | 6            |                    |
|         |         | Within 7 days |              | Log-rank test<br>p |
|         |         | Survival      | Non-survival |                    |
| 28 days | Control | 28            | 5            | 0.676              |
|         | rhTM    | 39            | 5            |                    |
| 90 days | Control | 26            | 7            | 0.901              |
|         | rhTM    | 34            | 10           |                    |
