# Supplementary material
Source: HighWire-hosted journal article supplement (https://bmjopen.bmj.com/content/6/12/e012850)
Supplement: inline-supplementary-material-2 [file inline-supplementary-material-2.pdf]

Supplemental Figure 1

Kaplan-Meier Curve of the patients  
in rhTM group with DIC resolution within day 3  
and control group with DIC resolution within day 7

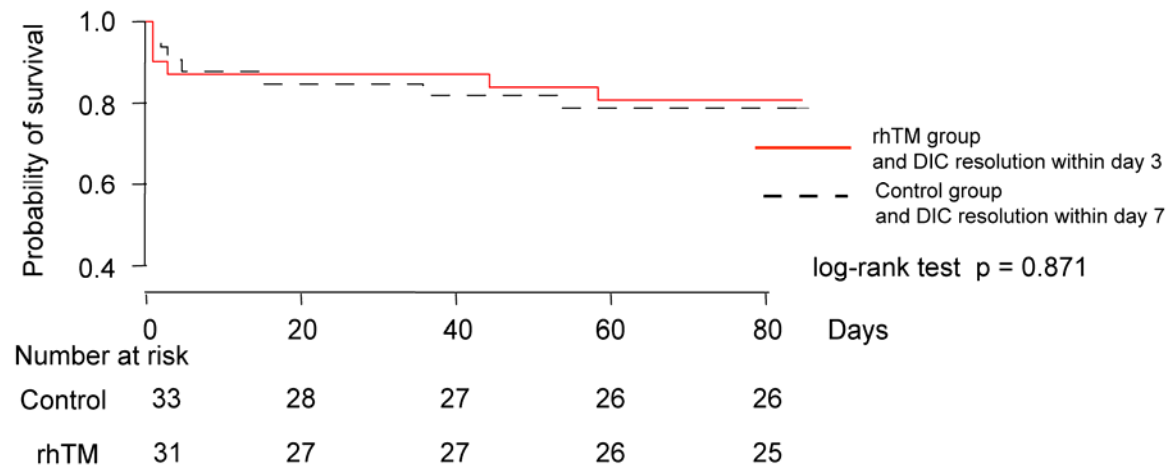

Kaplan–Meier curve of the patients with DIC resolution within 3 days in the rhTM group and within 7 days in the control group. The log rank test showed that  $p = 0.871$ .
